# Supplementary material
Source: PubMed Central journal article supplement (PMC3322847)

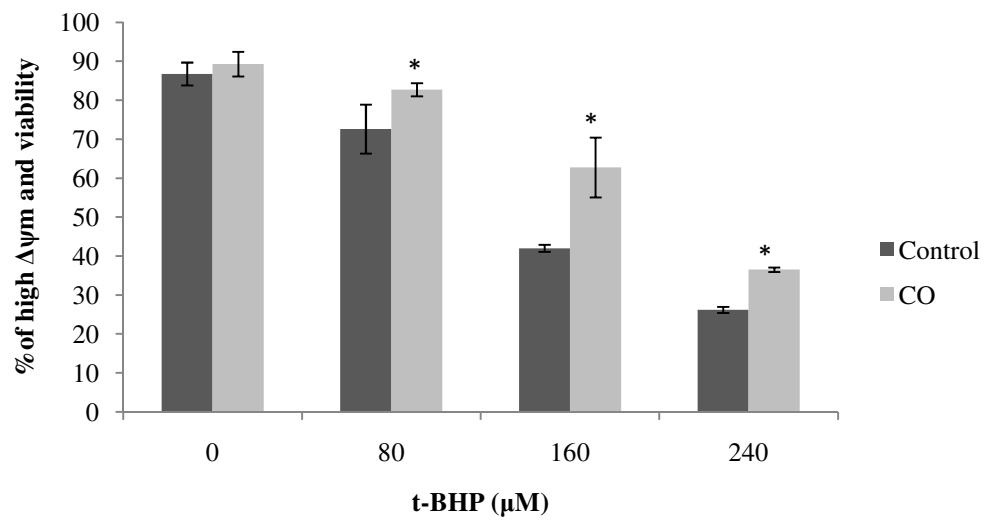

Supplement: supp_M111.306738v1_SMFig1.pdf [file supp_M111.306738v1_SMFig1.pdf]

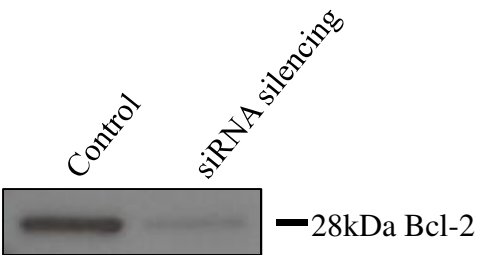

Supplement: supp_M111.306738v1_SMFig2.pdf [file supp_M111.306738v1_SMFig2.pdf]
